# Supplementary material for: Ni3Fe/BC nanocatalysts based on biomass charcoal self-reduction achieves excellent hydrogen storage performance of MgH2
Source: Royal Society of Chemistry journal article supplement (doi:10.1039/d2dt02425j), 2022-01-01
Supplement: d2dt02425j1.pdf [file d2dt02425j1.pdf]

Ni<sub>3</sub>Fe/BC nanocatalyst based on biomass charcoal self-reduction achieves  
excellent hydrogen storage performance of MgH<sub>2</sub>

Quanhui Hou<sup>a,b</sup>, Jiaqi Zhang<sup>b</sup>, Zhuan Zheng<sup>a</sup>, Xinglin Yang<sup>b\*</sup>, Zhao Ding<sup>c\*</sup>

a. School of Automotive Engineering, Yancheng Institute of Technology, Yancheng, 224051, China

b. School of Energy and Power, Jiangsu University of Science and Technology, Zhenjiang, 212003, China

c. College of Materials Science and Engineering, National Engineering Research Center for Magnesium Alloys, Chongqing University, Chongqing, 400044, China

\* Corresponding author. School of Energy and Power, Jiangsu University of Science and Technology, Zhenjiang, 212003, China

E-mail addresses: yangxl233@163.com (X.L. Yang).

\* Corresponding author. College of Materials Science and Engineering, National Engineering Research Center for Magnesium Alloys, Chongqing University, Chongqing, 400044, China

E-mail addresses: zhaoding@cqu.edu.cn (Z Ding).

## Supplementary Figures

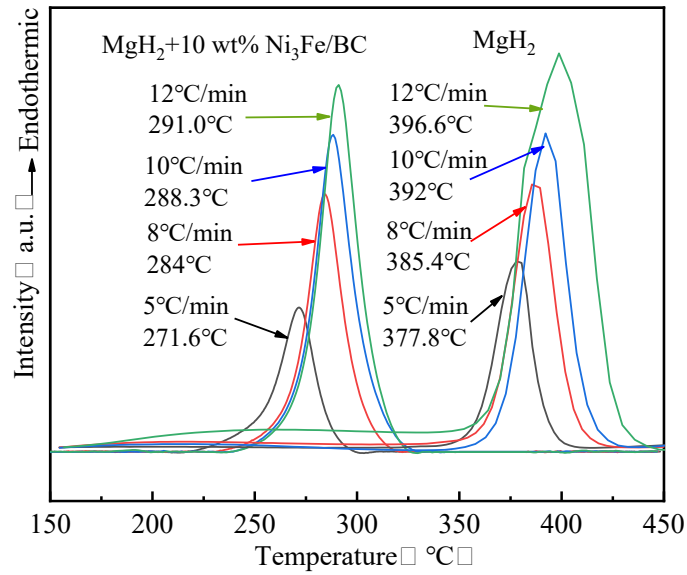

**Fig. S1.** DSC curves of  $\text{MgH}_2$  and  $\text{MgH}_2+10 \text{ wt\% Ni}_3\text{Fe/BC}$  at different heating rates

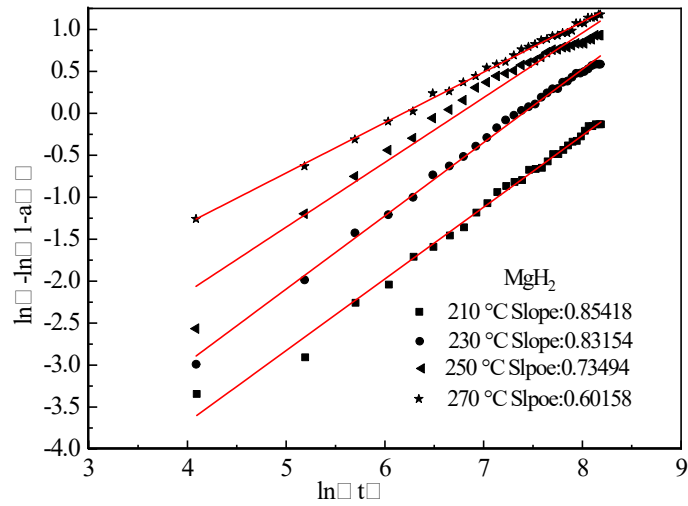

**Fig. S2.** JMAK plots of  $\text{MgH}_2$

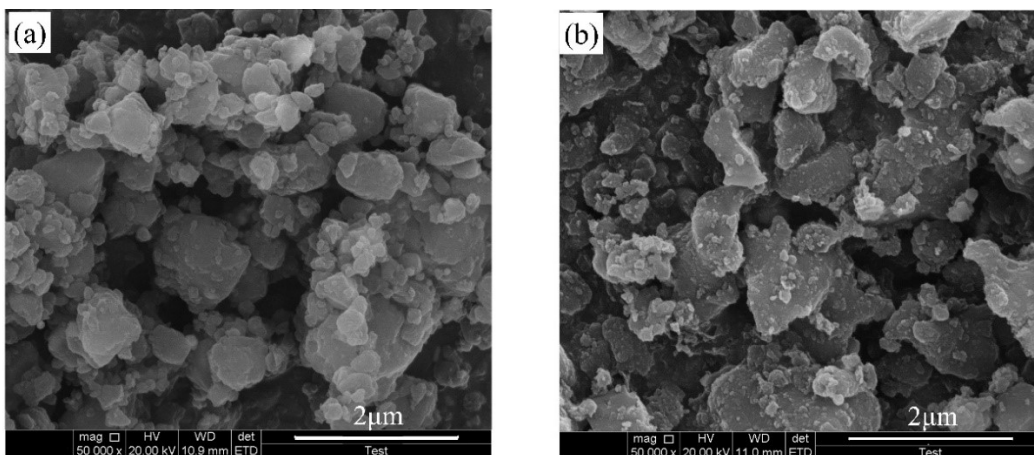

**Fig. S3.** SEM images of  $\text{MgH}_2+10 \text{ wt.}\% \text{ Ni}_3\text{Fe/BC}$  after ball milling (a) and  $\text{MgH}_2+10 \text{ wt.}\% \text{ Ni}_3\text{Fe/BC}$  after 20 cycles (b).

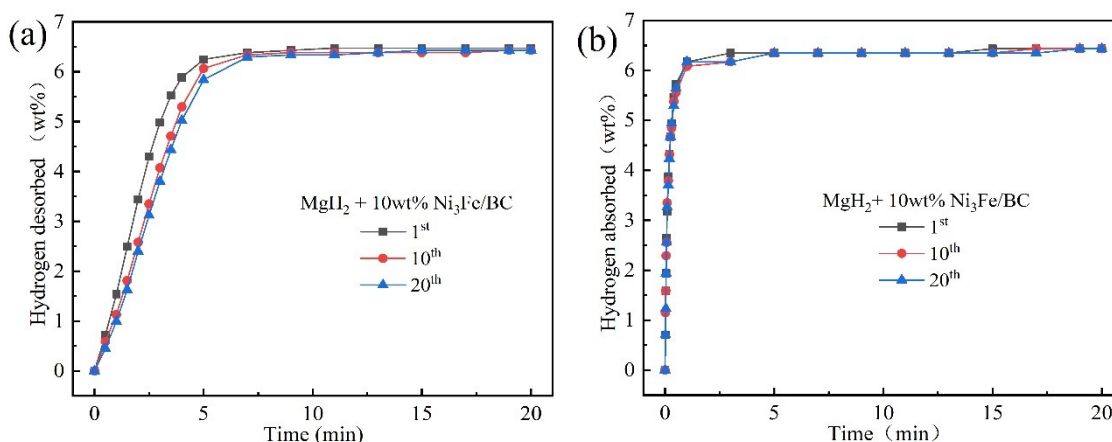

**Fig. S4.** Comparison of hydrogen release performance of  $\text{MgH}_2+10 \text{ wt.}\% \text{ Ni}_3\text{Fe/BC}$  at different cycling stages (a), comparison of hydrogen absorption performance of  $\text{MgH}_2+10 \text{ wt.}\% \text{ Ni}_3\text{Fe/BC}$  at different cycling stages (b).

**Table S1** Effect of different catalyst doping on initial dehydrogenation temperature of  $\text{MgH}_2$

| Sample                                                            | initial dehydrogenation temperature ( $^{\circ}\text{C}$ ) | Refs.     |
|-------------------------------------------------------------------|------------------------------------------------------------|-----------|
| $\text{MgH}_2+5 \text{ wt.}\% \text{ FeNi/rGO}$                   | 230                                                        | 36        |
| $\text{MgH}_2+ 5 \text{ wt.}\% \text{ Ni}_3\text{Fe/rGO}$         | 185                                                        | 35        |
| $\text{MgH}_2+9 \text{ wt.}\% \text{ NiO/C}$                      | 195                                                        | 19        |
| $\text{MgH}_2\text{-Ni/Al}_2\text{O}_3$                           | 190                                                        | 46        |
| $\text{MgH}_2\text{-70TiO}_2\text{@rGO}$                          | 240                                                        | 47        |
| $\text{MgH}_2\text{-5 wt.}\% \text{ K}_2\text{Ti}_8\text{O}_{17}$ | 189                                                        | 48        |
| $\text{MgH}_2+10 \text{ wt.}\% \text{ Ni}_3\text{Fe/BC}$          | 184.5                                                      | This work |
